# Supplementary material for: Characterization of Fruit Vinegars via Bioactive and Organic Acid Profile Using Chemometrics
Source: MDPI journal article supplement (doi:10.3390/foods12203769), 2023-10-13
Supplement: s1 [file s1]

Supp. Table S1. Linear relationships between pH, total acidity, organic acid and phenolic compounds of vinegar samples

|    | 1     | 2     | 3     | 4     | 5     | 6     | 7     | 8     | 9     | 10    | 11    | 12    | 13    | 14    | 15    | 16    | 17    | 18    | 19    | 20    | 21    | 22    | 23    | 24    | 25    | 26    | 27   | 28    | 29    | 30    | 31    | 32    | 33    | 34    | 35    | 36    | 37    | 38   | 39   | 40 |
|----|-------|-------|-------|-------|-------|-------|-------|-------|-------|-------|-------|-------|-------|-------|-------|-------|-------|-------|-------|-------|-------|-------|-------|-------|-------|-------|------|-------|-------|-------|-------|-------|-------|-------|-------|-------|-------|------|------|----|
| 1* | 1.00  |       |       |       |       |       |       |       |       |       |       |       |       |       |       |       |       |       |       |       |       |       |       |       |       |       |      |       |       |       |       |       |       |       |       |       |       |      |      |    |
| 2  | -0.34 | 1.00  |       |       |       |       |       |       |       |       |       |       |       |       |       |       |       |       |       |       |       |       |       |       |       |       |      |       |       |       |       |       |       |       |       |       |       |      |      |    |
| 3  | -0.68 | 0.55  | 1.00  |       |       |       |       |       |       |       |       |       |       |       |       |       |       |       |       |       |       |       |       |       |       |       |      |       |       |       |       |       |       |       |       |       |       |      |      |    |
| 4  | 0.24  | -0.60 | -0.09 | 1.00  |       |       |       |       |       |       |       |       |       |       |       |       |       |       |       |       |       |       |       |       |       |       |      |       |       |       |       |       |       |       |       |       |       |      |      |    |
| 5  | -0.10 | -0.11 | 0.36  | 0.34  | 1.00  |       |       |       |       |       |       |       |       |       |       |       |       |       |       |       |       |       |       |       |       |       |      |       |       |       |       |       |       |       |       |       |       |      |      |    |
| 6  | 0.00  | 0.06  | -0.24 | -0.05 | -0.16 | 1.00  |       |       |       |       |       |       |       |       |       |       |       |       |       |       |       |       |       |       |       |       |      |       |       |       |       |       |       |       |       |       |       |      |      |    |
| 7  | -0.13 | 0.42  | 0.03  | -0.45 | -0.05 | -0.22 | 1.00  |       |       |       |       |       |       |       |       |       |       |       |       |       |       |       |       |       |       |       |      |       |       |       |       |       |       |       |       |       |       |      |      |    |
| 8  | -0.12 | -0.52 | 0.08  | 0.88  | 0.37  | -0.21 | -0.29 | 1.00  |       |       |       |       |       |       |       |       |       |       |       |       |       |       |       |       |       |       |      |       |       |       |       |       |       |       |       |       |       |      |      |    |
| 9  | -0.10 | -0.10 | 0.36  | 0.32  | 0.99  | -0.22 | 0.00  | 0.37  | 1.00  |       |       |       |       |       |       |       |       |       |       |       |       |       |       |       |       |       |      |       |       |       |       |       |       |       |       |       |       |      |      |    |
| 10 | 0.49  | -0.32 | -0.46 | -0.14 | -0.15 | 0.51  | -0.54 | -0.44 | -0.19 | 1.00  |       |       |       |       |       |       |       |       |       |       |       |       |       |       |       |       |      |       |       |       |       |       |       |       |       |       |       |      |      |    |
| 11 | 0.02  | 0.07  | -0.25 | -0.06 | -0.18 | 0.99  | -0.23 | -0.22 | -0.23 | 0.52  | 1.00  |       |       |       |       |       |       |       |       |       |       |       |       |       |       |       |      |       |       |       |       |       |       |       |       |       |       |      |      |    |
| 12 | -0.14 | 0.44  | 0.04  | -0.46 | -0.06 | -0.23 | 1.00  | -0.29 | -0.01 | -0.54 | -0.24 | 1.00  |       |       |       |       |       |       |       |       |       |       |       |       |       |       |      |       |       |       |       |       |       |       |       |       |       |      |      |    |
| 13 | -0.08 | -0.42 | -0.06 | -0.27 | -0.17 | -0.14 | -0.18 | -0.18 | -0.16 | 0.44  | -0.15 | -0.18 | 1.00  |       |       |       |       |       |       |       |       |       |       |       |       |       |      |       |       |       |       |       |       |       |       |       |       |      |      |    |
| 14 | 0.04  | 0.23  | -0.21 | -0.35 | 0.06  | -0.17 | 0.95  | -0.21 | 0.11  | -0.42 | -0.17 | 0.94  | -0.20 | 1.00  |       |       |       |       |       |       |       |       |       |       |       |       |      |       |       |       |       |       |       |       |       |       |       |      |      |    |
| 15 | -0.11 | -0.12 | 0.36  | 0.34  | 0.99  | -0.21 | -0.02 | 0.39  | 0.99  | -0.18 | -0.23 | -0.03 | -0.16 | 0.08  | 1.00  |       |       |       |       |       |       |       |       |       |       |       |      |       |       |       |       |       |       |       |       |       |       |      |      |    |
| 16 | 0.53  | -0.16 | -0.40 | -0.11 | -0.43 | -0.13 | -0.37 | -0.16 | -0.43 | 0.46  | -0.09 | -0.37 | 0.35  | -0.31 | -0.42 | 1.00  |       |       |       |       |       |       |       |       |       |       |      |       |       |       |       |       |       |       |       |       |       |      |      |    |
| 17 | -0.50 | 0.86  | 0.76  | -0.35 | 0.34  | 0.12  | 0.19  | -0.24 | 0.33  | -0.32 | 0.12  | 0.20  | -0.45 | 0.04  | 0.33  | -0.38 | 1.00  |       |       |       |       |       |       |       |       |       |      |       |       |       |       |       |       |       |       |       |       |      |      |    |
| 18 | 0.68  | -0.19 | -0.24 | 0.24  | 0.02  | -0.07 | -0.19 | -0.21 | 0.00  | 0.39  | -0.08 | -0.19 | -0.12 | -0.16 | -0.01 | 0.03  | -0.25 | 1.00  |       |       |       |       |       |       |       |       |      |       |       |       |       |       |       |       |       |       |       |      |      |    |
| 19 | 0.51  | -0.27 | -0.49 | -0.17 | -0.35 | 0.55  | -0.45 | -0.49 | -0.39 | 0.97  | 0.56  | -0.45 | 0.44  | -0.38 | -0.39 | 0.48  | -0.37 | 0.41  | 1.00  |       |       |       |       |       |       |       |      |       |       |       |       |       |       |       |       |       |       |      |      |    |
| 20 | -0.59 | 0.61  | 0.77  | -0.30 | -0.28 | -0.14 | 0.18  | -0.18 | -0.27 | -0.40 | -0.15 | 0.20  | 0.05  | -0.14 | -0.27 | -0.25 | 0.52  | -0.14 | -0.27 | 1.00  |       |       |       |       |       |       |      |       |       |       |       |       |       |       |       |       |       |      |      |    |
| 21 | -0.05 | 0.02  | -0.21 | -0.03 | -0.11 | 0.99  | -0.20 | -0.18 | -0.16 | 0.49  | 0.98  | -0.20 | -0.11 | -0.15 | -0.16 | -0.24 | 0.10  | -0.05 | 0.52  | -0.12 | 1.00  |       |       |       |       |       |      |       |       |       |       |       |       |       |       |       |       |      |      |    |
| 22 | 0.19  | -0.14 | -0.41 | -0.47 | -0.09 | -0.08 | 0.68  | -0.43 | -0.05 | 0.12  | -0.10 | 0.67  | 0.43  | 0.75  | -0.07 | -0.05 | -0.34 | 0.01  | 0.16  | -0.23 | -0.05 | 1.00  |       |       |       |       |      |       |       |       |       |       |       |       |       |       |       |      |      |    |
| 23 | -0.27 | 0.25  | 0.07  | -0.44 | 0.50  | -0.18 | 0.54  | -0.20 | 0.53  | -0.28 | -0.18 | 0.54  | -0.13 | 0.65  | 0.52  | -0.32 | 0.36  | -0.38 | -0.42 | -0.27 | -0.16 | 0.43  | 1.00  |       |       |       |      |       |       |       |       |       |       |       |       |       |       |      |      |    |
| 24 | -0.10 | 0.14  | -0.22 | -0.18 | -0.11 | 0.92  | 0.12  | -0.29 | -0.15 | 0.32  | 0.91  | 0.11  | -0.19 | 0.17  | -0.15 | -0.39 | 0.17  | -0.09 | 0.38  | -0.10 | 0.95  | 0.17  | 0.06  | 1.00  |       |       |      |       |       |       |       |       |       |       |       |       |       |      |      |    |
| 25 | 0.28  | -0.01 | -0.27 | 0.04  | 0.05  | 0.51  | -0.25 | -0.33 | 0.00  | 0.46  | 0.49  | -0.25 | -0.36 | -0.17 | 0.00  | -0.31 | 0.05  | 0.64  | 0.43  | -0.24 | 0.54  | -0.13 | -0.08 | 0.51  | 1.00  |       |      |       |       |       |       |       |       |       |       |       |       |      |      |    |
| 26 | -0.19 | 0.47  | -0.07 | -0.53 | -0.04 | 0.23  | 0.83  | -0.47 | -0.01 | -0.26 | 0.22  | 0.83  | -0.31 | 0.82  | -0.03 | -0.56 | 0.32  | -0.12 | -0.20 | 0.07  | 0.27  | 0.58  | 0.59  | 0.56  | 0.23  | 1.00  |      |       |       |       |       |       |       |       |       |       |       |      |      |    |
| 27 | -0.10 | -0.11 | 0.36  | 0.49  | 0.87  | 0.14  | -0.28 | 0.52  | 0.84  | -0.03 | 0.13  | -0.29 | -0.20 | -0.19 | 0.85  | -0.26 | 0.36  | -0.15 | -0.21 | -0.24 | 0.16  | -0.34 | 0.21  | 0.05  | -0.04 | -0.24 | 1.00 |       |       |       |       |       |       |       |       |       |       |      |      |    |
| 28 | 0.16  | 0.12  | 0.40  | 0.30  | 0.76  | -0.21 | -0.31 | 0.25  | 0.75  | 0.00  | -0.20 | -0.31 | -0.27 | -0.25 | 0.75  | 0.09  | 0.45  | 0.12  | -0.18 | -0.17 | -0.24 | -0.43 | 0.20  | -0.35 | -0.04 | -0.38 | 0.79 | 1.00  |       |       |       |       |       |       |       |       |       |      |      |    |
| 29 | -0.07 | 0.03  | -0.18 | -0.01 | -0.08 | 0.99  | -0.21 | -0.16 | -0.13 | 0.47  | 0.98  | -0.21 | -0.12 | -0.16 | -0.12 | -0.25 | 0.13  | -0.06 | 0.51  | -0.12 | 1.00  | -0.07 | -0.15 | 0.94  | 0.53  | 0.25  | 0.20 | -0.20 | 1.00  |       |       |       |       |       |       |       |       |      |      |    |
| 30 | 0.49  | -0.36 | -0.03 | 0.40  | 0.46  | -0.23 | -0.35 | 0.05  | 0.45  | 0.34  | -0.24 | -0.35 | 0.01  | -0.28 | 0.45  | -0.09 | -0.17 | 0.85  | 0.24  | -0.25 | -0.18 | -0.08 | -0.17 | -0.27 | 0.51  | -0.30 | 0.25 | 0.44  | -0.17 | 1.00  |       |       |       |       |       |       |       |      |      |    |
| 31 | -0.28 | -0.12 | 0.34  | 0.52  | 0.67  | 0.43  | -0.36 | 0.55  | 0.63  | -0.01 | 0.41  | -0.37 | -0.22 | -0.30 | 0.64  | -0.40 | 0.34  | -0.25 | -0.13 | -0.12 | 0.46  | -0.44 | 0.03  | 0.34  | 0.07  | -0.18 | 0.91 | 0.51  | 0.50  | 0.07  | 1.00  |       |       |       |       |       |       |      |      |    |
| 32 | 0.25  | 0.33  | 0.03  | -0.07 | 0.11  | -0.03 | -0.21 | -0.02 | 0.12  | 0.07  | 0.01  | -0.21 | -0.28 | -0.15 | 0.12  | 0.61  | 0.33  | -0.23 | -0.01 | -0.22 | -0.15 | -0.37 | 0.15  | -0.24 | -0.24 | -0.30 | 0.31 | 0.63  | -0.13 | -0.20 | 0.11  | 1.00  |       |       |       |       |       |      |      |    |
| 33 | 0.04  | -0.03 | -0.27 | 0.02  | -0.14 | 0.99  | -0.21 | -0.15 | -0.19 | 0.52  | 0.99  | -0.22 | -0.10 | -0.15 | -0.19 | -0.15 | 0.04  | -0.03 | 0.57  | -0.17 | 0.99  | -0.03 | -0.22 | 0.92  | 0.49  | 0.22  | 0.16 | -0.23 | 0.99  | -0.18 | 0.45  | -0.10 | 1.00  |       |       |       |       |      |      |    |
| 34 | 0.20  | -0.44 | -0.11 | -0.08 | 0.06  | -0.29 | -0.37 | -0.02 | 0.07  | 0.47  | -0.27 | -0.37 | 0.82  | -0.30 | 0.08  | 0.66  | -0.39 | -0.09 | 0.39  | -0.23 | -0.31 | 0.21  | -0.06 | -0.46 | -0.46 | -0.59 | 0.09 | 0.21  | -0.31 | 0.14  | -0.10 | 0.23  | -0.27 | 1.00  |       |       |       |      |      |    |
| 35 | -0.27 | 0.12  | -0.07 | -0.33 | -0.25 | 0.88  | -0.21 | -0.33 | -0.29 | 0.52  | 0.88  | -0.21 | 0.22  | -0.21 | -0.29 | -0.01 | 0.16  | -0.35 | 0.55  | 0.05  | 0.87  | 0.01  | -0.09 | 0.80  | 0.22  | 0.17  | 0.04 | -0.30 | 0.87  | -0.44 | 0.33  | -0.02 | 0.86  | 0.00  | 1.00  |       |       |      |      |    |
| 36 | -0.01 | 0.01  | 0.33  | 0.35  | 0.79  | 0.37  | -0.32 | 0.22  | 0.76  | 0.21  | 0.36  | -0.33 | -0.23 | -0.25 | 0.76  | -0.33 | 0.45  | 0.11  | 0.06  | -0.18 | 0.40  | -0.31 | 0.13  | 0.29  | 0.31  | -0.11 | 0.91 | 0.73  | 0.43  | 0.41  | 0.86  | 0.20  | 0.39  | -0.03 | 0.22  | 1.00  |       |      |      |    |
| 37 | 0.31  | 0.07  | -0.15 | 0.25  | -0.01 | -0.23 | -0.02 | 0.37  | 0.01  | -0.27 | -0.20 | -0.03 | -0.35 | 0.06  | 0.01  | 0.55  | 0.00  | -0.29 | -0.29 | -0.27 | -0.34 | -0.28 | 0.02  | -0.38 | -0.50 | -0.30 | 0.19 | 0.40  | -0.33 | -0.32 | 0.03  | 0.81  | -0.26 | 0.12  | -0.30 | -0.08 | 1.00  |      |      |    |
| 38 | -0.27 | -0.04 | 0.02  | 0.25  | -0.05 | 0.88  | -0.27 | 0.17  | -0.10 | 0.21  | 0.86  | -0.27 | -0.17 | -0.27 | -0.09 | -0.38 | 0.13  | -0.17 | 0.26  | 0.06  | 0.90  | -0.28 | -0.31 | 0.81  | 0.36  | 0.10  | 0.29 | -0.21 | 0.91  | -0.22 | 0.64  | -0.23 | 0.89  | -0.39 | 0.76  | 0.42  | -0.28 | 1.00 |      |    |
| 39 | -0.04 | -0.01 | -0.18 | 0.05  | -0.03 | 0.98  | -0.24 | -0.11 | -0.08 | 0.48  | 0.97  | -0.24 | -0.14 | -0.18 | -0.07 | -0.26 | 0.12  | -0.03 | 0.50  | -0.15 | 0.99  | -0.10 | -0.16 | 0.93  | 0.54  | 0.22  | 0.25 | -0.16 | 0.99  | -0.13 | 0.54  | -0.12 | 0.99  | -0.31 | 0.84  | 0.48  | -0.31 | 0.92 | 1.00 |    |
| 40 |       |       |       |       |       |       |       |       |       |       |       |       |       |       |       |       |       |       |       |       |       |       |       |       |       |       |      |       |       |       |       |       |       |       |       |       |       |      |      |    |

\*1: Total acidity; 2: pH; 3: Maleic acid; 4: Malonic acid; 5: Barbituric acid; 6: Oksalic-dyhidrate 7: DL-isocitric acid; 8: (-)Quinic acid; 9: Shikimic acid; 10: Adipic acid; 11: Oxalic acid; 12: Citric acid; 13: D-(-)-Tartaric acid; 14: D-(+)-Malic acid; 15:Succinic acid; 16: L-(+)-Lactic acid; 17: Acetic acid; 18: Fumaric acid; 19: Propionic acid; 20: Isobutyric acid; 21: Butyric acid; 22: Ascorbic acid; 23: Gallic acid; 24: Ferulic acid; 25: Protocatechuic acid; 26: Hydroxybenzoic acid; 27: Vanillic acid; 28: Gentisic acid; 29: *p*-coumaric acid; 30: *o*-coumaric acid; 31: Trans-sinamic acid; 32: Catechin; 33: Rutin; 34: Naringin; 35: Neohesperidin; 36: Coumarin; 37: Resveratrol; 38: Quarcetin; 39: Hesperidin; 40: Alizarin

**Supp. Table S2.** Linear relationships between total anthocyanin content, antioxidant capacity (DPPH) and Total phenolic content

|         | TAC   | DPPH-E | DPPH-H | DPPH-B | DPPH-B% | TPC-E | TPC-H | TPC-B | TPC-B% |
|---------|-------|--------|--------|--------|---------|-------|-------|-------|--------|
| TAC*    | 1.00  |        |        |        |         |       |       |       |        |
| DPPH-E  | 0.60  | 1.00   |        |        |         |       |       |       |        |
| DPPH-H  | 0.55  | 0.00   | 1.00   |        |         |       |       |       |        |
| DPPH-B  | 0.35  | 0.17   | 0.26   | 1.00   |         |       |       |       |        |
| DPPH-B% | 0.07  | -0.11  | 0.06   | 0.94   | 1.00    |       |       |       |        |
| TPC-E   | -0.04 | 0.00   | -0.34  | 0.75   | 0.85    | 1.00  |       |       |        |
| TPC-H   | 0.02  | -0.05  | -0.23  | 0.40   | 0.48    | 0.75  | 1.00  |       |        |
| TPC-B   | 0.26  | 0.18   | 0.11   | 0.97   | 0.94    | 0.85  | 0.52  | 1.00  |        |
| TPC-B%  | 0.44  | 0.34   | 0.67   | 0.39   | 0.16    | -0.27 | -0.59 | 0.26  | 1.00   |

\*TAC: Total anthocyanin content; DPPH: Trolox equivalent antioxidant capacity according to DPPH method; TPC: Total phenolic content; E: Extractable phenolic fraction; H: Hydrolysable phenolic fraction; B: Bioaccessible phenolic fraction; B% Bioaccessibility
